# Supplementary material for: Methane-trapping metal–organic frameworks with an aliphatic ligand for efficient CH4/N2 separation
Source: Royal Society of Chemistry journal article supplement (doi:10.1039/c9se00838a), 2019-10-28
Supplement: c9se00838a1.pdf [file c9se00838a1.pdf]

## Electronic Supplementary Information

# Methane-Trapping Metal-Organic Frameworks with An Aliphatic Ligand for Efficient CH<sub>4</sub>/N<sub>2</sub> Separation

Miao Chang<sup>‡</sup><sup>a</sup>, Yingjie Zhao<sup>‡</sup><sup>a</sup>, Dahuan Liu<sup>\*a</sup>, Jiangfeng Yang<sup>b</sup>, Jinping Li<sup>b</sup> and Chongli Zhong<sup>a,c</sup>

<sup>a</sup> Beijing Advanced Innovation Center for Soft Matter Science and Engineering, Beijing University of Chemical Technology, Beijing 100029, China

<sup>b</sup> Research Institute of Special Chemicals, Taiyuan University of Technology, Taiyuan 030024, Shanxi China

<sup>c</sup> State Key Laboratory of Separation Membranes and Membrane Processes, Tianjin Polytechnic University, Tianjin 300387, China

### Table of Contents

|                                                              |     |
|--------------------------------------------------------------|-----|
| <b>1. Experimental Section</b> .....                         | S1  |
| <b>1.1 Materials</b> .....                                   | S1  |
| <b>1.2 Instrumentation</b> .....                             | S1  |
| <b>1.3 Synthesis of MOFs</b> .....                           | S1  |
| <b>1.4 Gas adsorption measurement</b> .....                  | S2  |
| <b>1.5 Breakthrough measurement</b> .....                    | S2  |
| <b>1.6 Property calculations</b> .....                       | S2  |
| <b>1.7 Calculation of isosteric heat of adsorption</b> ..... | S3  |
| <b>1.8 Theoretical calculations</b> .....                    | S3  |
| <b>2. Adsorption isotherms</b> .....                         | S4  |
| <b>3. Calculation of selectivity</b> .....                   | S5  |
| <b>4. Characterization of MOFs</b> .....                     | S8  |
| <b>5. Comparison with other porous materials</b> .....       | S11 |
| <b>References</b> .....                                      | S14 |

## 1. Experimental Section

### 1.1 Materials

All chemicals reagents and solvents are commercially available and directly used without further purification. Metal salts and the organic ligand were purchased from J&K Scientific Ltd. Methanol and N, N-dimethylformamide (DMF) were obtained from TCI.

### 1.2 Instrumentation

Powder X-ray diffraction (PXRD) was measured by D8 Advance X diffractometer equipped with a Cu sealed tube ( $\lambda = 1.54178 \text{ \AA}$ ). The specific surface area, pore size and adsorption isotherms were measured on a Quantachrome Autosorb-IQ instrument. The FT-IR spectroscopy data was obtained by Nicolet 6700 FTIR instrument. The morphologies of materials were confirmed by Field-Emission Scanning Electron Microscopy (FESEM, Gemini 300). The lattice fringe of the material was obtained by high-resolution TEM (HRTEM, H-9500). Thermogravimetric analysis was performed by GA Q50 from 298 K to 1073 K with air atmosphere and the heating rate was 5 K/min. The concentration of the effluent gas from column determined by a gas chromatograph (Shimadzu, GC-2014C) for breakthrough experiment.

### 1.3 Synthesis of MOFs

Al-CDC was synthesized using the modified method on the basis of the previously reported one in literature.<sup>1</sup>  $\text{AlCl}_3 \cdot 6\text{H}_2\text{O}$  (1.448 g, 6 mmol),  $\text{H}_2\text{CDC}$  (1.002 g, 6 mmol) were mixed with DMF (32 ml) and distilled water (8 ml) in a round bottom flask (50 ml) at 403 K for about 5 minutes with stirred, then the white product was obtained by centrifugation. After being washed with DMF and acetone several times, the material was dried in the vacuum oven at 403 K for 12 h.

Cu-CDC was synthesized according to the previously reported method in literature.<sup>2</sup>  $\text{Cu}(\text{NO}_3)_2 \cdot 6\text{H}_2\text{O}$  (2.95 g),  $\text{H}_2\text{CDC}$  (2.15 g) and DMF (150 g) were placed in a 100 ml Teflon-lined steel autoclave, followed by being transferred into oven and then heated to 358 K for 3 days. The obtained blue crystals were filtered and washed several times with DMF and methanol. Finally, the material was dried in the vacuum oven at 403 K for 12 h.

In-CDC was synthesized according to the previously reported method in literature.<sup>3</sup> InCl<sub>3</sub>•4H<sub>2</sub>O (350 mg, 1.19 mmol) and H<sub>2</sub>CDC (420 mg, 2.45 mmol) were mixed in acetonitrile (14 ml) and distilled water (28 ml). Then, the mixture was put in a 100 ml Teflon-lined stainless steel vessel autoclave and heated to 433 K for 3 days. The white crystals were obtained by centrifugation, washed by distilled water and acetone several times. Finally, the material was placed in a vacuum oven at 403 K for 12 h.

#### 1.4 Gas adsorption measurement

CH<sub>4</sub> and N<sub>2</sub> adsorption isotherms at different temperatures as well as cycle experiment of CH<sub>4</sub> adsorption were measured by a Quantachrome Autosorb-IQ instrument. About 800 mg sample was outgassed at 473 K for 12 h before gas adsorption measurement.

#### 1.5 Breakthrough measurement

3.50 g sample was filled in the column (10 × 150 mm) and purged with helium (25 ml/min) at 473 K for 6 h until the device was cooled down to room temperature. Then the equimolar mixture of CH<sub>4</sub> and N<sub>2</sub> was flowed into the column with the total flow rate of 10.0 ml/min. The effluent gas from the column was detected by gas chromatograph (Shimadzu, GC-2014C). The uptake capacity ( $q_i$ ) were determined using the following equation:<sup>4</sup>

$$q_i = \frac{C_i V}{22.4 \times m} \times \int_0^t \left(1 - \frac{F}{F_0}\right) dt$$

where  $q_i$  refers to the uptake capacity of gas  $i$  (cm<sup>3</sup>/g),  $C_i$  represents the initial feed gas concentration,  $V$  is the volumetric feed flow rate (cm<sup>3</sup>/min),  $t$  is the adsorption time (min),  $F_0$  and  $F$  are the influent and effluent gas molar flow rates of specific gas (cm<sup>3</sup>/min), respectively, and  $m$  is the mass of the adsorbent (g). The selectivity ( $S_{\text{breakthrough}}$ ) of the breakthrough experiment is calculated using the following equation:<sup>4</sup>

$$S_{\text{breakthrough}} = \frac{q_1/y_1}{q_2/y_2}$$

where  $y_i$  is the molar fraction of gas  $i$  ( $i=1, 2$ ) in the gas mixture.

#### 1.6 Property calculations

Selectivities of the studied materials were calculated using the ideal adsorbed solution theory (IAST) according to the single component experimental isotherms data.<sup>5</sup>  $S_{ij}$  represents adsorption selectivity of  $i$  and  $j$  components which is defined as:

$$S_{ij} = \frac{x_i/x_j}{y_i/y_j}$$

where  $x_i$  and  $x_j$  are the gas adsorption capacities of  $i$  and  $j$  components, and  $y_i$  and  $y_j$  are gas molar fractions of  $i$  and  $j$  components, respectively.

Sorbent selection parameter (SSP) is a parameter introduced first by Yang et al.<sup>6</sup> and promoted by Snurr et al.<sup>7</sup> as an overall separation performance indicator for a cyclic pressure-swing adsorption (PSA) or vacuum-swing adsorption (VSA) process, which can be calculated as:

$$SSP = \frac{(S_{ij}^{ads})^2}{(S_{ij}^{des})} \times \frac{(N_i^{ads} - N_i^{des})}{(N_j^{ads} - N_j^{des})}$$

where  $S_{ij}^{ads}$  and  $S_{ij}^{des}$  are the selectivities of  $i$  and  $j$  components under adsorption and desorption conditions, and  $N^{ads}$  and  $N^{des}$  are the adsorption capacity under adsorption and desorption conditions.

### 1.7 Calculation of isosteric heat of adsorption

The heat of adsorption is calculated using the following equation:<sup>8</sup>

$$Q_{st} = \frac{RT_1T_2}{T_2 - T_1} \ln \frac{P_1}{P_2}$$

where  $R$ ,  $P_i$  and  $T_i$  represent the molar gas constant (8.314 J/K/mol), the pressure of isotherm, and temperature of isotherm, respectively.

### 1.8 Theoretical calculations

2D potential energy distributions were calculated using a simple Monte Carlo technique in the framework of MOFs.<sup>9</sup> One pore was specifically divided into 20 circles and the potential energies were scanned at a certain interval along the circumference for each circle. At each point,  $10^5$  random orientations were generated to obtain the lowest potential energies for CH<sub>4</sub> or N<sub>2</sub> molecules. The binding energy of CH<sub>4</sub> or N<sub>2</sub> molecules with the framework was calculated by density functional theory (DFT) using applying Dmol<sup>3</sup> in Materials Studio. We used the generalized gradient approximation (GGA) with the Perdew-

Burke-Ernzerh of (PBE) functional for the calculations. For the purpose of expanding electronic wave functions, the double numerical plus d-functions (DND) basis set is selected. The self-consistent field (SCF) calculations are used with a convergence criterion of  $10^{-6}$  Ha in energy. In order to accelerate the self-consistent field convergence, thermal smearing with a value of 0.005 Ha is used to orbital occupation to speed up convergence. The interaction energy between the molecule of  $\text{CH}_4$  or  $\text{N}_2$  and Al-CDC is defined as:

$$E_{\text{int}} = E_{\text{gas+materials}} - E_{\text{gas}} - E_{\text{materials}}$$

where  $E_{\text{int}}$  is the total energy for adsorption of  $\text{CH}_4$  or  $\text{N}_2$  to Al-CDC, and  $E_{\text{gas}}$  and  $E_{\text{materials}}$  are the energies of gas molecule and Al-CDC, respectively.

## 2. Adsorption isotherms

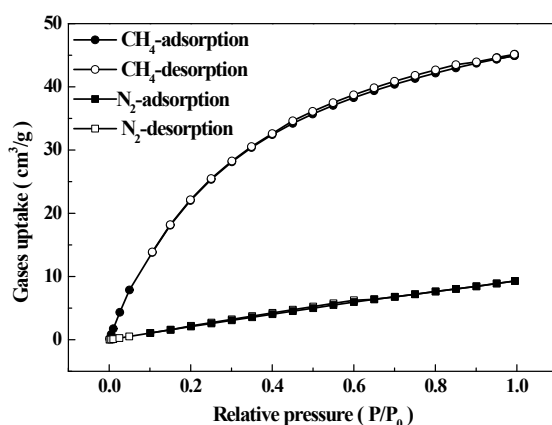

**Fig. S1** Single component adsorption isotherms of  $\text{CH}_4$  and  $\text{N}_2$  of Al-CDC at 273 K.

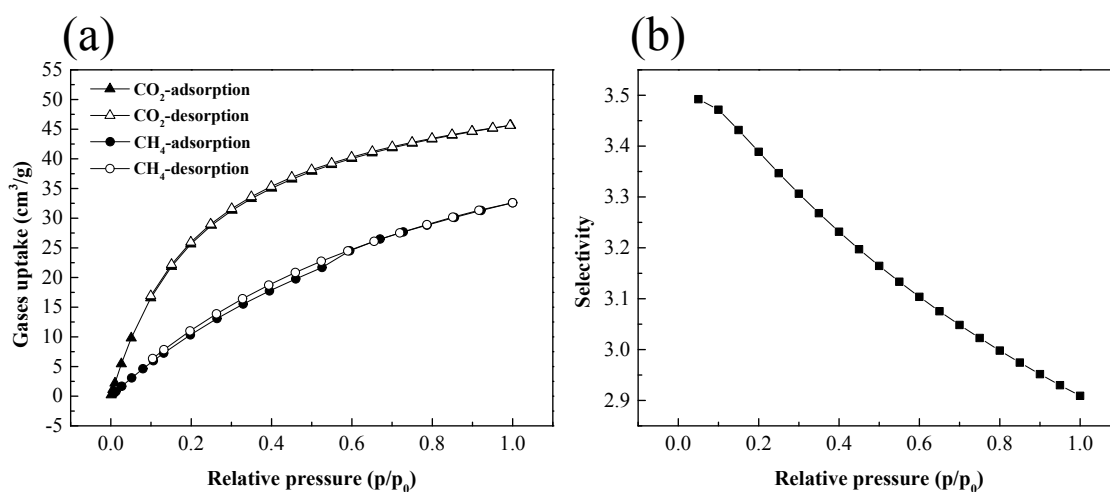

**Fig. S2** (a) Single component adsorption isotherm of  $\text{CO}_2$  and  $\text{CH}_4$  of Al-CDC at 298 K; (b) IAST selectivity of  $\text{CO}_2$  and  $\text{CH}_4$  with equimolar mixtures ( $\text{CO}_2:\text{CH}_4 = 50:50$ ) at 298 K.

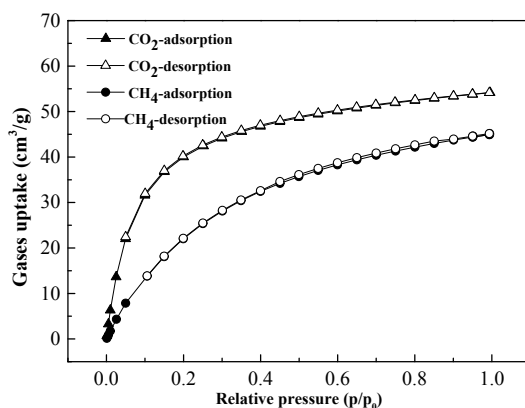

Fig. S3 Single component adsorption isotherms of CO<sub>2</sub> and CH<sub>4</sub> of Al-CDC at 273 K.

### 3. Calculation of selectivity

The single component isotherms for CH<sub>4</sub> and N<sub>2</sub> (CH<sub>4</sub>/N<sub>2</sub> (50/50, v/v)) at 298 K were fitted to the dual-site Langmuir equation :

$$y = \left( \frac{p_1 \times x}{p_2 + x} \right) + \left( \frac{p_3 \times x}{p_4 + x} \right)$$

The equilibrium composition of the CH<sub>4</sub>/N<sub>2</sub> mixture is 22.62: 1.73.

The calculated IAST selectivities are about 13.1-16.69 at the range of tested pressures and 13.1 at 1.0 bar.

The fitting parameters are given in **Table S1**.

**Table S1** The fitting parameters by using the dual-site Langmuir equation based on the single-component isotherms data of CH<sub>4</sub> and N<sub>2</sub> in Al-CDC at 298 K.

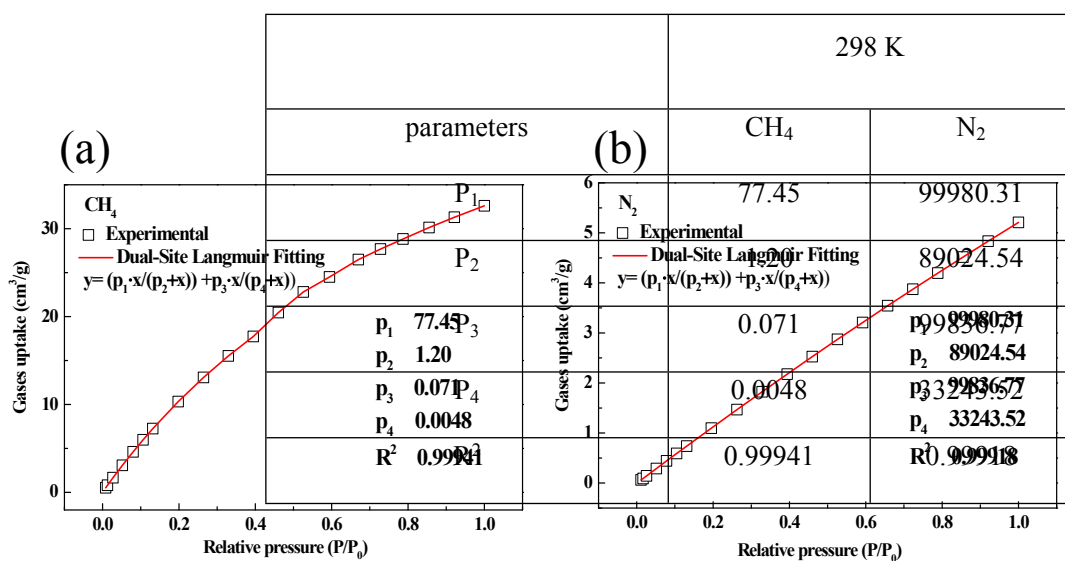

Fig. S4 Fitting of the CH<sub>4</sub> (a) and N<sub>2</sub> (b) adsorption data of Al-CDC at 298 K using dual-site Langmuir model.

The single component isotherms of CH<sub>4</sub> and N<sub>2</sub> (CH<sub>4</sub> /N<sub>2</sub> (50/50, v/v)) at 298 K were fitted to the Toth equation :

$$y = \frac{N_{\max} \times p_1 \times x}{(1 + (p_1 \times x)^{p_2})^{1/p_2}}$$

$$K_H = N_{\max} \times p_1$$

$$S_{i,j} = K_{H,i} / K_{H,j}$$

The ideal selectivity is about 13.06.

The fitting parameters are given in **Table S2**.

**Table S2** The fitting parameters by using the Toth equation based on the pure single component isotherms data of CH<sub>4</sub> and N<sub>2</sub> in Al-CDC at 298 K.

| Parameters       | CH <sub>4</sub> | N <sub>2</sub> |
|------------------|-----------------|----------------|
| N <sub>max</sub> | 81.773          | 27.999         |
| P <sub>1</sub>   | 0.814           | 0.182          |
| P <sub>2</sub>   | 1.060           | 1.272          |
| R <sup>2</sup>   | 0.99956         | 0.99999        |

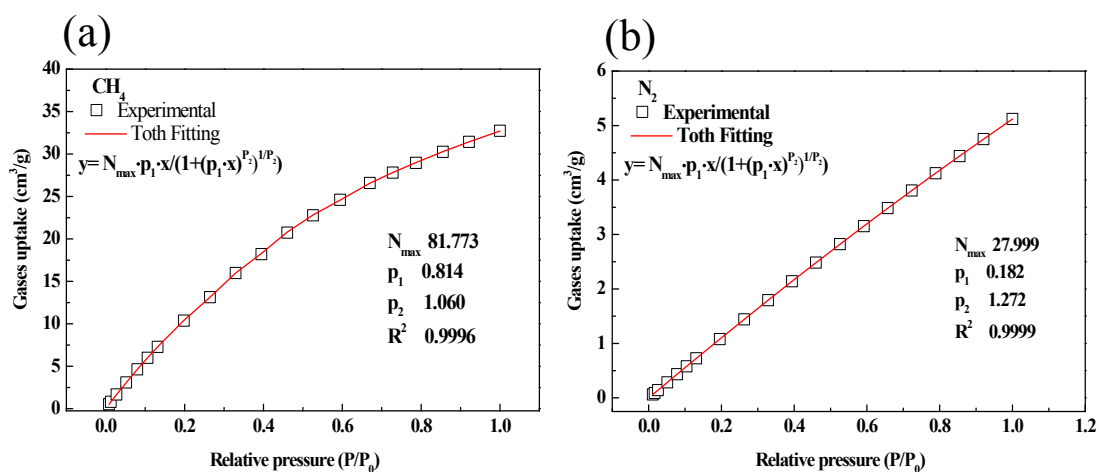

**Fig. S5** Fitting of the CH<sub>4</sub> (a) and N<sub>2</sub> (b) adsorption data of Al-CDC at 298 K using Toth model.

The single component isotherms for CO<sub>2</sub> and CH<sub>4</sub> (CO<sub>2</sub>/CH<sub>4</sub> (50/50, v/v)) at 298 K were fitted to the dual-site Langmuir equation :

$$y = \left( \frac{P_1 \times x}{p_2 + x} \right) + \left( \frac{P_3 \times x}{p_4 + x} \right)$$

The equilibrium composition of the CO<sub>2</sub>/CH<sub>4</sub> mixture is 32.00: 11.00.

The calculated IAST selectivities are about 2.91-3.49 at the range of tested pressures and 2.91 at 1.0 bar.

The fitting parameters are given in **Table S3**.

**Table S3** The fitted parameters by using the dual-site Langmuir equation based on the single-component isotherms data of CO<sub>2</sub> and CH<sub>4</sub> in Al-CDC at 298 K.

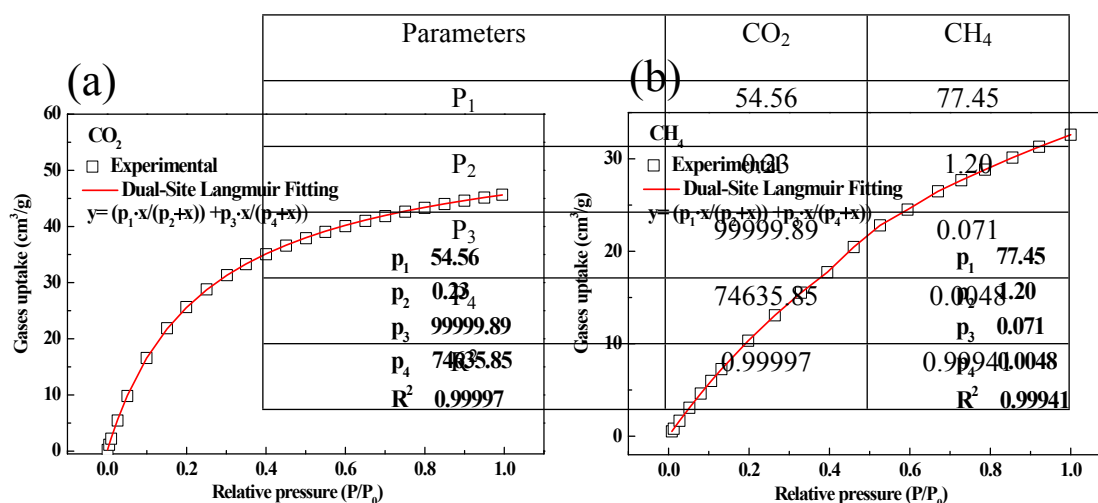

**Fig. S6** Fitting of the CO<sub>2</sub> (a) and CH<sub>4</sub> (b) adsorption data of Al-CDC at 298 K using dual-site Langmuir model.

#### 4. Characterization of MOFs

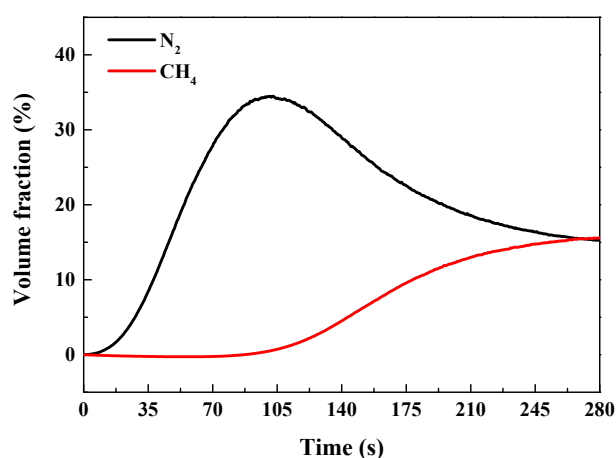

**Fig. S7** Breakthrough experiment curves for the CH<sub>4</sub> and N<sub>2</sub> (10/10, v/v) binary mixture component with the presence of water (water contents: 5 %) at constant flow rate of 10 ml/min under 298 K and 1 bar



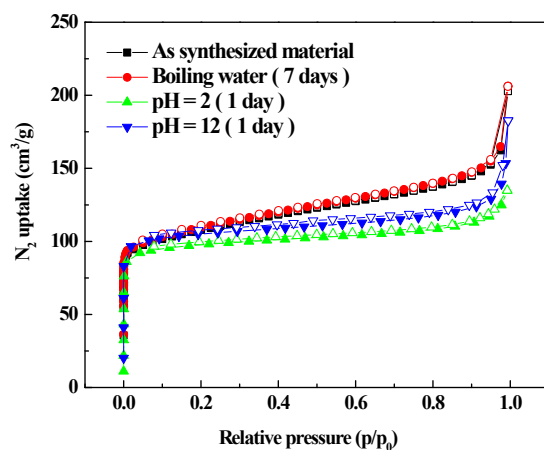

**Fig. S8**  $N_2$  adsorption isotherms at 77 K after the treatment of the material using boiling water, acid and base solution for days.

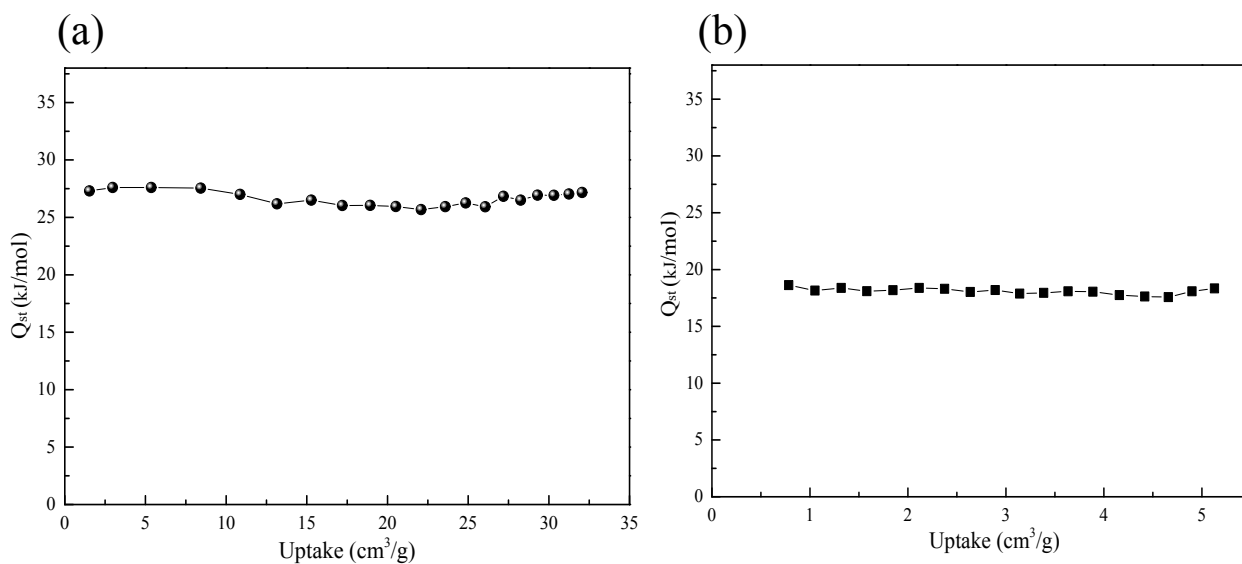

**Fig. S9** Calculated isosteric heat values for  $CH_4$  (a) and  $N_2$  (b) of Al-CDC.

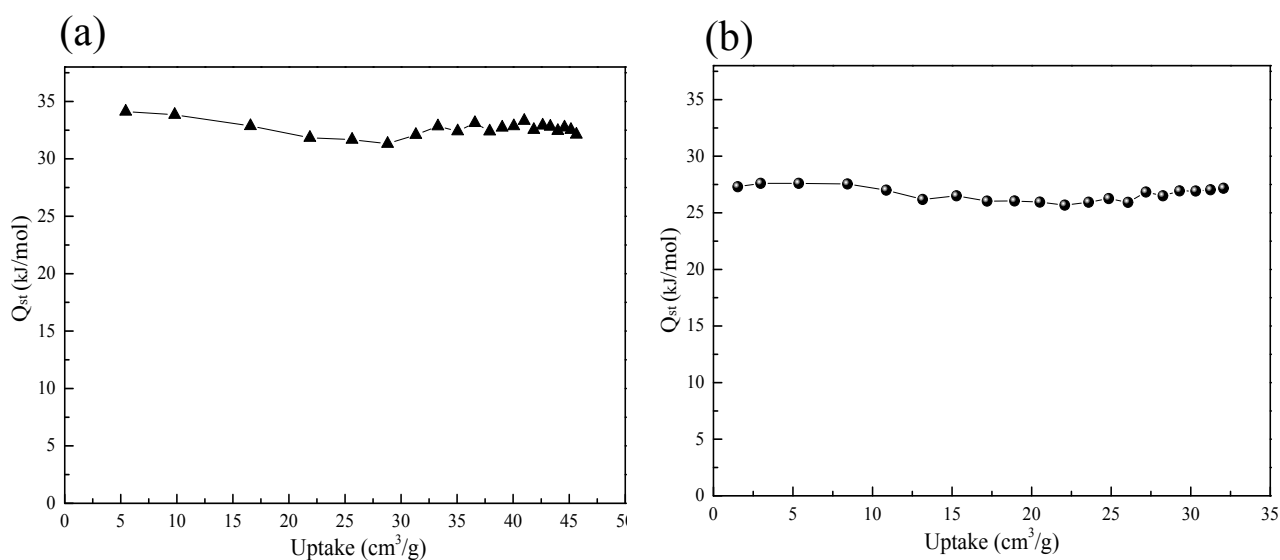

**Fig. S10** Calculated isosteric heat values for  $CO_2$  (a) and  $CH_4$  (b) of Al-CDC.

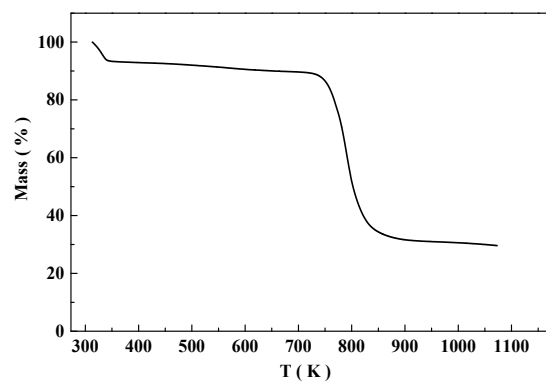

**Fig. S11** TGA curve of Al-CDC.

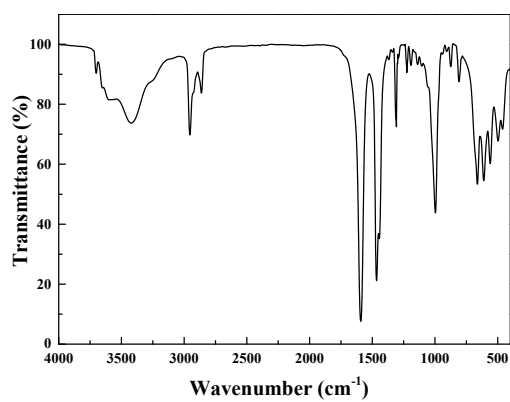

**Fig. S12** FT-IR spectra of Al-CDC.

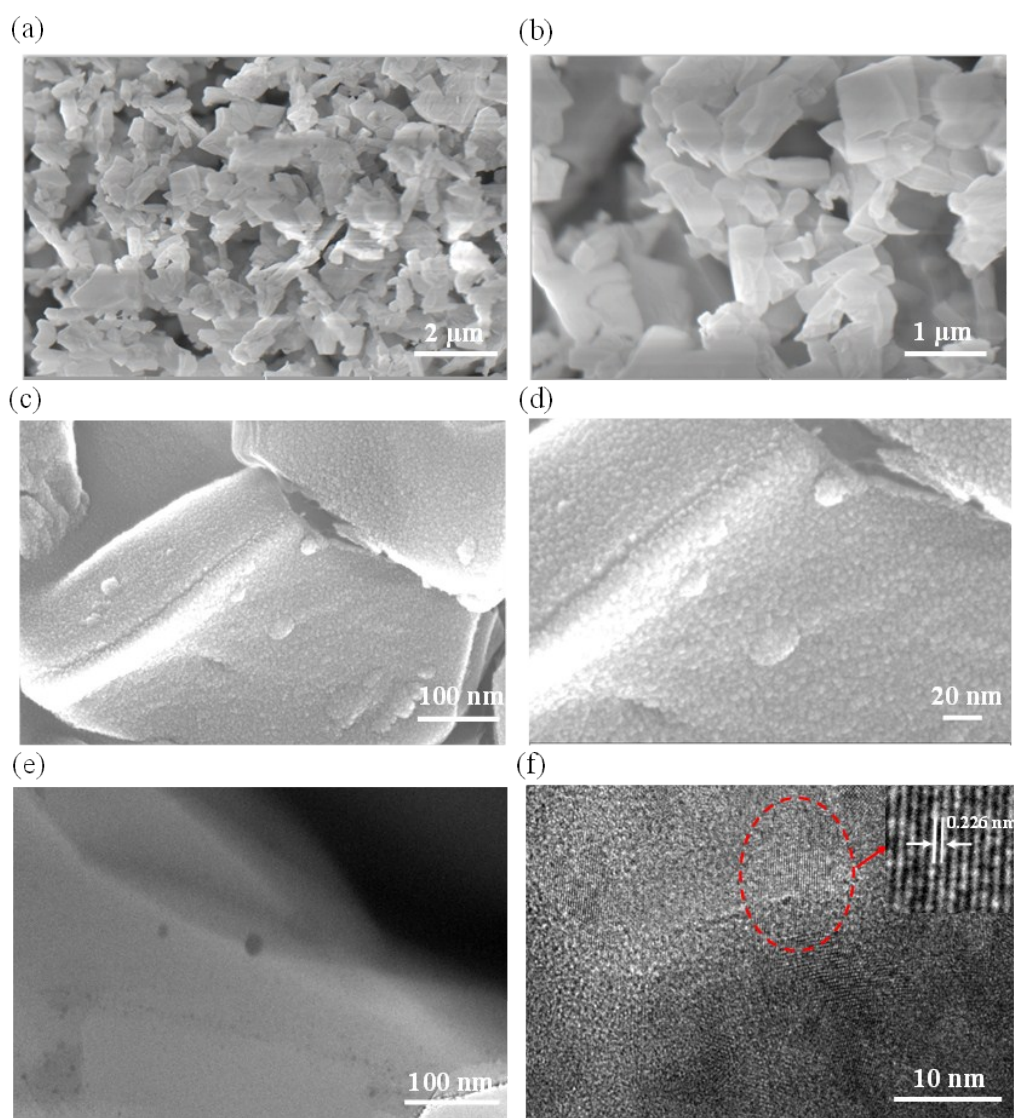

**Fig. S13** FESEM images (a-d) and HRTEM images (e-f (Inset: the inverse Fourier transform of the red image area)) of Al-CDC.

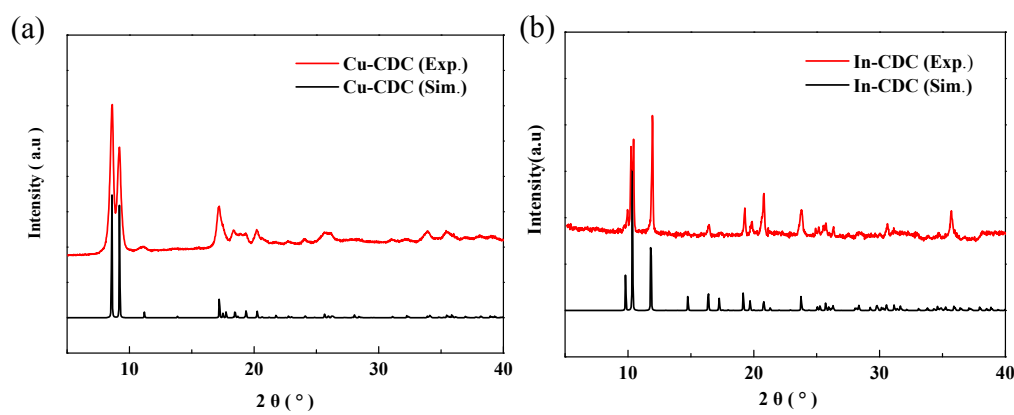

**Fig. S14** Powder X-ray diffraction patterns of Cu-CDC (a) and In-CDC (b).

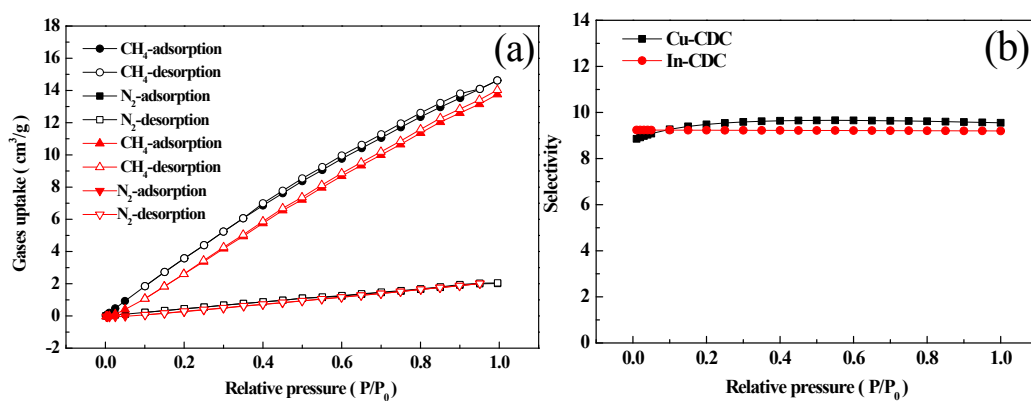

**Fig. S15** (a) single component adsorption isotherm of CH<sub>4</sub> and N<sub>2</sub> for Cu-CDC (black), In-CDC (red) at 298 K, 1 bar. (b) IAST selectivity of CH<sub>4</sub>/N<sub>2</sub> for Cu-CDC, In-CDC with equimolar mixtures (CH<sub>4</sub> : N<sub>2</sub> = 50 : 50) at 298 K.

**Table S4** Pore size, BET surface area and Pore volume of Al-CDC

| MOF    | Pore size (Å) <sup>a</sup> | BET surface area (m <sup>2</sup> /g) <sup>b</sup> | Pore volume (cm <sup>3</sup> /g) <sup>c</sup> |
|--------|----------------------------|---------------------------------------------------|-----------------------------------------------|
| Al-CDC | 5.4                        | 380                                               | 0.257                                         |

<sup>a</sup> Calculated by DFT method. <sup>b</sup> Calculated from N<sub>2</sub> adsorption isotherms at 77 K in the range of P/P<sub>0</sub> = 0.001– 0.05.

<sup>c</sup> Calculated by adsorbed amounts of N<sub>2</sub> at P/P<sub>0</sub> = 0.95.

## 5. Comparison with other porous materials

**Table S5** Selectivity and adsorption heat of CH<sub>4</sub> and N<sub>2</sub> in different materials at 298 K and 1 bar.

| Adsorbents                             | Selectivity<br>for 50/50<br>CH <sub>4</sub> /N <sub>2</sub><br>mixture | Q <sub>st</sub> for CH <sub>4</sub><br>(kJ/mol) | Q <sub>st</sub> for N <sub>2</sub><br>(kJ/mol) | Refs.     |
|----------------------------------------|------------------------------------------------------------------------|-------------------------------------------------|------------------------------------------------|-----------|
| Co-MOF                                 | 12.5 <sup>a</sup>                                                      | 25.13                                           | 18.12                                          | 10        |
| sOMC                                   | 3.5 <sup>a</sup>                                                       |                                                 |                                                | 4         |
| CTF-650                                | 8.6 <sup>a</sup>                                                       | 27                                              |                                                | 4         |
| Na-SAPO-34                             | 2.6 <sup>b</sup>                                                       | 12.18                                           | 22.03                                          | 11        |
| AC                                     | 3.85 <sup>a</sup>                                                      |                                                 |                                                | 12        |
| [Ni <sub>3</sub> (HCOO) <sub>6</sub> ] | 6.1 <sup>c</sup>                                                       | 24.82                                           | 19.33                                          | 12        |
| [Co <sub>3</sub> (HCOO) <sub>6</sub> ] | 5.1 <sup>c</sup>                                                       | 23.03                                           | 19.7                                           | 12        |
| Cu-BTC                                 | 3.69 <sup>c</sup>                                                      | 16.6                                            | 13.9                                           | 12        |
| Mg-Clinoptilolite                      | 2 <sup>c</sup>                                                         |                                                 |                                                | 12        |
| [Cu(Me-4py-trz-ia)]                    | 4.2 <sup>a</sup>                                                       | 18                                              | 12                                             | 13        |
| Basolite A100                          | 3.7 <sup>a</sup>                                                       | 19                                              | 15.9                                           | 13        |
| MOF-888                                | 8.38 <sup>a</sup>                                                      | 26                                              | 22                                             | 14        |
| MOF-889                                | 6.41 <sup>a</sup>                                                      | 22                                              | 19                                             | 14        |
| MOF-890                                | 7 <sup>a</sup>                                                         | 23                                              | 19                                             | 14        |
| MOF-891                                | 7.78 <sup>a</sup>                                                      | 22                                              | 21                                             | 14        |
| MOF-5                                  | 1.13 <sup>c</sup>                                                      | 12.2                                            |                                                | 15        |
| MOF-177                                | 4 <sup>c</sup>                                                         | 11.74                                           |                                                | 15        |
| Cu(OTf) <sub>2</sub>                   | 4.8 <sup>a</sup>                                                       | 19.6                                            | 16                                             | 16        |
| ZIF-68                                 | 3.5 <sup>a</sup>                                                       | 15.7 <sup>e</sup>                               | 11.9 <sup>e</sup>                              | 17        |
| ZIF-69                                 | 3 <sup>a</sup>                                                         | 16.2 <sup>e</sup>                               | 12.8 <sup>e</sup>                              | 17        |
| Ni-MOF                                 | 6 <sup>a</sup>                                                         | 22.2                                            | 18                                             | 18        |
| ZIF-8                                  | 2.8 <sup>d</sup>                                                       | 12.4 <sup>e</sup>                               | 9.8 <sup>e</sup>                               | 19        |
| MIL-101- Cr                            | 2.65 <sup>a</sup> (293 K)                                              | 15.73 (293 K)                                   | 12 (293 K)                                     | 20        |
| Cu-MOF                                 | 6.9 <sup>a</sup>                                                       | 24                                              | 20                                             | 21        |
| Cu(INA) <sub>2</sub>                   | 8.34 <sup>c</sup>                                                      | 17.52                                           |                                                | 22        |
| Al-BDC                                 | 3.56 <sup>c</sup>                                                      | 18.74                                           |                                                | 22        |
| Ni-HKUST-1                             | 5.1 <sup>a</sup>                                                       |                                                 |                                                | 23        |
| Boron nitride                          | 10 <sup>a</sup>                                                        |                                                 |                                                | 24        |
| [Ni <sub>3</sub> (HCOO) <sub>6</sub> ] | 6.18 <sup>c</sup>                                                      |                                                 |                                                | 25        |
| ATC-Cu                                 | 9.7 <sup>a</sup>                                                       | 26.8                                            | 16.0                                           | 26        |
| ROD-8                                  | 9.1 <sup>a</sup>                                                       | 16.7                                            |                                                | 27        |
| Zeolite 5A                             | 0.94 <sup>c</sup>                                                      |                                                 |                                                | 28        |
| Ni(OAc) <sub>2</sub> L                 | 7 <sup>a</sup>                                                         | 26.7                                            | 20                                             | 28        |
| Al-CDC                                 | 13.1 <sup>a</sup>                                                      | 27.5                                            | 18.6                                           | This work |
| Al-CDC                                 |                                                                        | 26.52 <sup>e</sup>                              | 10.7 <sup>e</sup>                              | This work |
| Al-CDC                                 | 13.3 <sup>c</sup>                                                      |                                                 |                                                | This work |

<sup>a</sup> Predicted by IAST. <sup>b</sup> Mixture selectivity. <sup>c</sup> Calculated by the ratio of Henry's law constants. <sup>d</sup> Calculated by theoretical calculations. <sup>e</sup> Obtained from calculations.

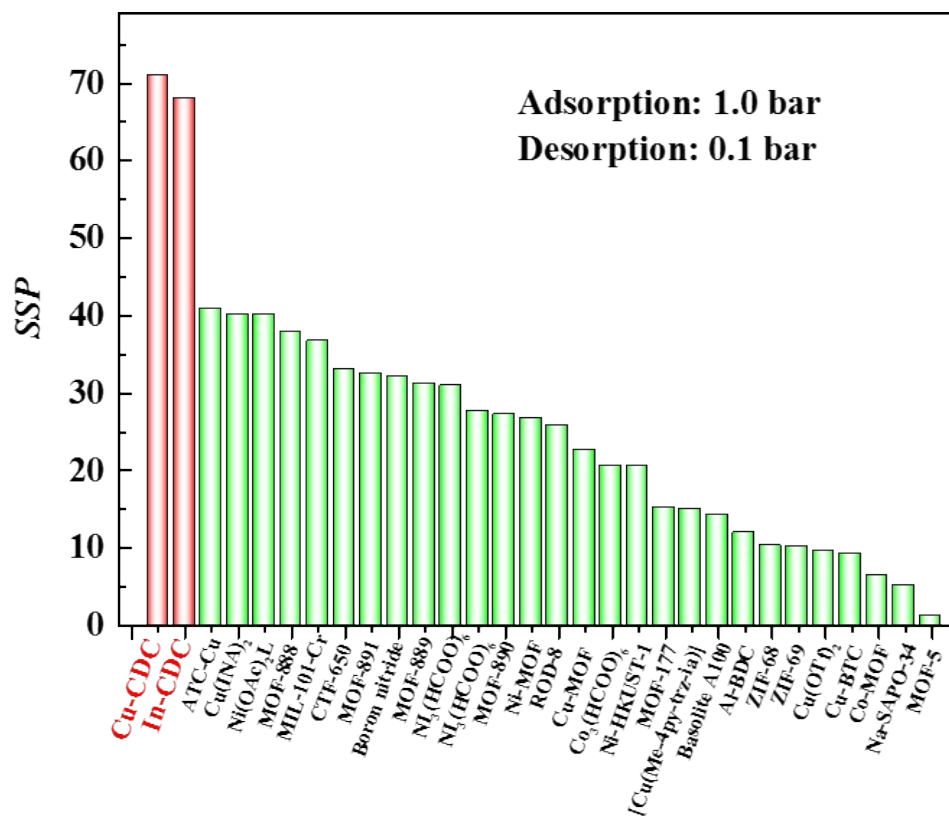

Fig. S16 Comparison of SSP in Cu-CDC and In-CDC with other reported porous materials..

**Table S6** Uptake capacity of CH<sub>4</sub> and SSP values in different materials at 298 K and 1.0 bar.

| <b>Adsorbents</b>                      | <b>Uptake capacity of CH<sub>4</sub> (cm<sup>3</sup>/g)</b> | <b>SSP value</b>           | <b>Refs</b> |
|----------------------------------------|-------------------------------------------------------------|----------------------------|-------------|
| Co-MOF                                 | 9.03                                                        | 6.32 <sup>a</sup>          | 10          |
| sOMC                                   | 22.0                                                        |                            | 4           |
| CTF-650                                | 32.0                                                        | 33 <sup>a</sup>            | 4           |
| Na-SAPO-34                             | 13.4                                                        | 5.08 <sup>b</sup>          | 11          |
| AC                                     | 5.68                                                        |                            | 12          |
| [Ni <sub>3</sub> (HCOO) <sub>6</sub> ] | 17.71                                                       | 27.6 <sup>c</sup>          | 12          |
| [Co <sub>3</sub> (HCOO) <sub>6</sub> ] | 10.98                                                       | 20.6 <sup>c</sup>          | 12          |
| Cu-BTC                                 | 20.41                                                       | 9.16 <sup>a</sup>          | 12          |
| Mg-Clinoptilolite                      |                                                             |                            | 12          |
| [Cu(Me-4py-trz-ia)]                    | 25.09                                                       | 15 <sup>a</sup>            | 13          |
| Basolite A100                          | 16.58                                                       | 14.21 <sup>a</sup>         | 13          |
| MOF-888                                | 10.09                                                       | 37.85 <sup>a</sup>         | 14          |
| MOF-889                                | 25.98                                                       | 31.15 <sup>a</sup>         | 14          |
| MOF-890                                | 23.97                                                       | 27.2 <sup>a</sup>          | 14          |
| MOF-891                                | 29.99                                                       | 32.41 <sup>a</sup>         | 14          |
| MOF-5                                  | 2.91                                                        | 1.05 <sup>c</sup>          | 15          |
| MOF-177                                | 12.61                                                       | 15.12 <sup>c</sup>         | 15          |
| Cu(OTf) <sub>2</sub>                   | 5.69                                                        | 9.6 <sup>a</sup>           | 16          |
| ZIF-68                                 | 8.96                                                        | 10.2 <sup>a</sup>          | 17          |
| ZIF-69                                 | 11.2                                                        | 10.08 <sup>a</sup>         | 17          |
| Ni-MOF                                 | 17.92                                                       | 26.56 <sup>a</sup>         | 18          |
| ZIF-8                                  | 4.48                                                        |                            | 19          |
| MIL-101- Cr                            | 14.56 (293 K)                                               | 36.65 <sup>a</sup> (293 K) | 20          |
| Cu(MOF)                                | 10.53                                                       | 22.57 <sup>a</sup>         | 21          |
| Cu(INA) <sub>2</sub>                   | 17.90                                                       | 40.16 <sup>c</sup>         | 22          |
| Al-BDC                                 | 16.31                                                       | 11.9 <sup>c</sup>          | 22          |
| Ni-HKUST-1                             | 37.49                                                       | 20.56 <sup>a</sup>         | 23          |
| Boron nitride                          | 14.78                                                       | 32 <sup>a</sup>            | 24          |
| [Ni <sub>3</sub> (HCOO) <sub>6</sub> ] | 18.37                                                       | 30.9 <sup>c</sup>          | 25          |
| ATC-Cu                                 | 64.96                                                       | 40.9 <sup>a</sup>          | 26          |
| ROD-8                                  | 17.16                                                       | 25.7 <sup>a</sup>          | 27          |
| Zeolite 5A                             | 22.62                                                       |                            | 28          |
| Ni(OAc) <sub>2</sub> L                 | 25.76                                                       | 40.1 <sup>a</sup>          | 28          |
| Al-CDC                                 | 32.06                                                       | 82 <sup>a</sup>            | This work   |
| Al-CDC                                 |                                                             | 81.3 <sup>c</sup>          | This work   |
| In-CDC                                 | 14.02                                                       | 68 <sup>a</sup>            | This work   |
| In-CDC                                 | 14.96                                                       | 71 <sup>a</sup>            | This work   |

<sup>a</sup> Calculated using IAST selectivity. <sup>b</sup> Calculated using mixture selectivity. <sup>c</sup> Calculated using selectivity obtained from Henry's law selectivity.

## References

- [1] F. Niekiet, M. Ackermann, P. Guerrier, A. Rothkirch, N. Stock, *Inorg. Chem.* **2013**, *52*, 8699-8705.
- [2] H. Kumagai, M. Tanaka, K. Lnoue, K. Takahashi, H. Kobayashi, S. Vilminot, M. Kurmoo, *Inorg. Chem.* **2007**, *46*, 5949-5956.
- [3] L. Wang, T. Song, C. Li, J. Xia, S. Wang, L. Wang, J. Xu, *J. Solid State Chem.* **2012**, *190*, 208-215.
- [4] K. Yao, Y. Chen, Y. Lu, Y. Zhao, Y. Ding, *Carbon* **2017**, *122*, 258-265.
- [5] J. Bachman, D. Reed, M. Kapelewski, G. Chachra, D. Jonnavittula, G. Radaelli, J. Long, *Energy Environ. Sci.* **2018**, *11*, 2423-2431.
- [6] S. Rege, R. Yang, *Sep. Sci. Technol.* 2001, *36*, 3355-3365.
- [7] Y. Bae, R. Snurr, *Angew. Chem. Int. Ed.* **2011**, *50*, 11586-11596.
- [8] Y. He, R. Krishna, B. Chen, *Energy Environ. Sci.* **2012**, *5*, 9107-9120.
- [9] M. Tong, Q. Yang, Q. Ma, D. Liu, C. Zhong, *J. Mater. Chem. A.* **2016**, *4*, 124-131.
- [10] L. Li, L. Yang, J. Wang, Z. Zhang, Q. Yang, Y. Yang, Q. Ren, Z. Bao, *AIChE J.* **2018**, *64*, 3681-3689.
- [11] M. Rivera-Ramos, A. Hernández-Maldonado, *Ind. Eng. Chem. Res.* **2007**, *46*, 4991-5002.
- [12] X. Ren, T. Sun, J. Hu, S. Wang, *Micropor. Mesopor. Mater.* **2014**, *186*, 137-145.
- [13] J. Möllmer, M. Lange, A. Möller, C. Patzschke, K. Stein, D. Läässig, J. Lincke, R. Gläser, H. Krautscheid, R. Staudt, *J. Mater. Chem.* **2012**, *22*, 10274-10286.
- [14] P. Nguyen, H. Nguyen, H. Pham, J. Kim, K. Cordova, H. Furukawa, *Inorg. Chem.* **2015**, *54*, 10065-10072.
- [15] D. Saha, Z. Bao, F. Jia, S. Deng, *Environ. Sci. Technol.* **2010**, *44*, 1820-1826.
- [16] X. Wang, L. Li, J. Yang, J. Li, *Chin. J. Chem. Eng.* **2016**, *24*, 1687-1694.
- [17] B. Liu, B. Smit, *J. Phys. Chem. C.* **2010**, *114*, 8515-8522.
- [18] X. Liu, Y. Guo, A. Tao, M. Fischer, T. Sun, P. Moghadam, D. Jimenez, S. Wang, *Chem. Commun.* **2017**, *53*, 11437-11440.
- [19] J. Prez-Pellitero, H. Amrouche, F. Siperstein, G. Pirngruber, C. Nieto-Draghi, G. Chaplais, A. Simon-Masseron, D. Bazer-Bachi, D. Peralta, N. Bats, *Chem. Eur. J.* **2010**, *16*, 1560-1571.
- [20] Y. Zhang, W. Su, Y. Sun, J. Liu, X. Liu, X. Wang, *J. Chem. Eng. Data.* **2015**, *60*, 2951-2957.
- [21] X. Wu, B. Yuan, Z. Bao, S. Deng, *J. Colloid Interface Sci.* **2014**, *430*, 78-84.
- [22] J. Hu, T. Sun, X. Liu, Y. Guo, S. Wang, *RSC Adv.* **2016**, *6*, 64039-64046.
- [23] X. Jia, N. Yuan, L. Wang, J. Yang, J. Li, *Eur. J. Inorg. Chem.* **2018**, *2018*, 1047-1052.



- [24] D. Saha, G. Orkoulas, S. Yohannan, H. Ho, E. Cakmak, J. Chen, S. Ozcan, *ACS Appl. Mater. Interfaces*. **2017**, *9*, 14506-14517.
- [25] Y. Guo, J. Hu, X. Liu, T. Sun, S. Zhao, S. Wang, *Chem. Eng. J.* **2017**, *327*, 564–572.
- [26] Z. Niu, X. Cui, T. Pham, P. Lan, H. Xing, K. Forrest, L. Wojtas, B. Space, S. Ma, *Angew. Chem. Int. Ed.* **2019**, *58*, 10138-10141.
- [27] R. Li, M. Li, X. Zhou, S. Ng, M. O'Keeffe, D. Li, *CrystEngComm*. **2014**, *16*, 6291–6295.
- [28] C. Kivi, B. Gelfand, H. Dureckova, H. Ho, C. Ma, G. Shimizu, T. Woo, D. Song, *Chem. Commun.* **2018**, *54*, 14104—14107.
